# Tuning Spatial Profiles of Selection Pressure to Modulate the Evolution of Resistance

Maxwell G. De Jong<sup>1</sup> and Kevin B. Wood<sup>1,2</sup>

<sup>1</sup>*Department of Physics, University of Michigan, Ann Arbor, Michigan 48109, USA*

<sup>2</sup>*Department of Biophysics, University of Michigan, Ann Arbor, Michigan 48109, USA\**

Spatial heterogeneity plays an important role in the evolution of drug resistance. While recent studies have indicated that spatial gradients of selection pressure can accelerate resistance evolution, much less is known about evolution in more complex spatial profiles. Here we use a stochastic toy model of drug resistance to investigate how different spatial profiles of selection pressure impact the time to fixation of a resistant allele. Using mean first passage time calculations, we show that spatial heterogeneity accelerates resistance evolution when the rate of spatial migration far exceeds that of mutation but slows fixation when mutation dominates. Interestingly, there exists an intermediate regime—characterized by comparable rates of migration and mutation—in which the rate of fixation can be either accelerated or decelerated depending on the spatial profile, even when spatially averaged selection pressure remains constant. Finally, we demonstrate that optimal tuning of the spatial profile can dramatically slow the spread and fixation of resistant subpopulations, which may lay the groundwork for optimized, spatially-resolved drug dosing strategies for mitigating the effects of drug resistance.

Drug resistance is a rapidly growing public health threat and a central impediment to the treatment of cancer, viruses, and microbial infections [1–4]. The battle against resistance has been largely fought at the molecular level, leading to an increasingly mature understanding of its underlying biochemical and genetic roots. At the same time, evolutionary biologists have long recognized resistance as a fundamentally stochastic process governed by the complex interplay between microbial ecology and evolutionary selection. The last decade, in particular, has seen a significant surge in efforts to develop and understand evolution-based treatment strategies to forestall resistance [5–16]. While the vast majority of this work focuses on spatially homogeneous environments, a number of recent studies, both theoretical and experimental, have demonstrated that spatial heterogeneity in drug concentration can dramatically alter the evolutionary dynamics leading to resistance [16–24]. On a practical level, the picture that emerges is somewhat bleak, as resistance evolution is dramatically accelerated in the presence of spatial gradients in drug concentration [18–20, 22–24] or heterogeneous drug penetration [17, 21]. Interestingly, however, recent work shows that this acceleration can be tempered or even reversed when the mutational pathway (i.e. the genotypic fitness landscape) leading to resistance contains fitness valleys [18], which are known to inhibit evolution [25–28]. Unfortunately, because the fitness landscape is a genetic property of the cells themselves, the potential for accelerated evolution appears to be “built in”, making it difficult to combat in a treatment setting. However, these results raise the question of whether non-monotonic profiles of tunable properties of the system—for example, the spatial selection pressure, which depends on the distribution of multiple environmental factors—might also have the potential to slow evolution, even when the mutational pathway lacks the requisite fitness valleys.

Evolution in natural or clinical settings takes place in heterogeneous environments characterized by spatial fluctuations in multiple factors, including drug concentrations, nutrients, temperature, pH, and host immune responses, all of which potentially affect cellular growth and selection pressure. Understanding evolution and ecology in such spatially extended systems is a challenging and long-studied problem [29–31]. Recent studies have demonstrated rich dynamics when inter-cellular interactions are defined on heterogeneous complex networks [32–34], where spatial structure can (for example) promote invasive strategies in tumor models [33] or modulate fixation times on random landscapes [32]. Remarkably, in the weak selection limit, evolutionary dynamics can be solved for any population structure [34], providing extensive insight into game-theoretic outcomes on complex networks. In addition, theoretical tools from statistical physics have proven useful for understanding spatiotemporal dynamics in spatially structured populations in a wide range of contexts, including biologically-inspired Monte Carlo models [18], toy models of source-sink dynamics [19], stepping-stone models of spatial pattern formation [35], models of dispersion [36–38], and Moran meta-population models [39–41]. In a similar spirit, here we use stochastic models of evolution along with theoretical tools from statistical physics to investigate the effects of spatially heterogeneous fitness pressures on the evolution of resistance. In contrast to previous models defined on heterogeneous networks at the single-cell level, here we consider meta-populations connected via simple topologies and investigate the effects of spatial structure imposed by arbitrary distributions of selection pressure. While several elegant approaches exist for studying these models in particular limits (i.e. with a center manifold reduction when timescale separations exist) [39–41], here we instead use a classical mean first passage time approach based on adjoint equations to re-

duce the calculation of mean fixation times to a simple collection of linear equations that can be easily solved for arbitrary spatial distributions of selection pressures. This method also allows us to find the fixation times from arbitrary initial states, which are often difficult to compute using other methods. Using this approach, we show that resistance evolution can be either accelerated or decelerated by spatial heterogeneities in selection pressure, even when the spatially averaged selection pressure remains constant. In addition, we demonstrate that tuning the spatial distribution of selection pressure can dramatically slow fixation when the subpopulations of resistant mutants are not uniformly distributed in space.

To investigate resistance evolution on a spatially heterogeneous landscape, we first consider a stochastic Moran-like model [42] of a finite population ( $N$ ) consisting of  $(N - n^*)$  wild-type cells with fitness  $r_0 \leq 1$  and  $n^*$  drug-resistant mutants with fitness  $r^*$ , which we set to unity without loss of generality. At each time step, cells are randomly selected for birth and death, with cells of higher fitness (in this case, resistant cells) chosen preferentially for division (see SI for full model with transition rates). Wild-type cells can mutate to become drug resistant at rate  $\mu$ ; we neglect reverse transitions to the drug-sensitive state. To incorporate spatial heterogeneity, we consider a simple spatially extended system with  $M$  distinct microhabitats, each containing  $N$  cells; cells are allowed to migrate at rate  $\beta$  between connected microhabitats (Fig. 1a). At each time  $t$ , the state of the system is characterized by the vector  $n^*(x_i)$  whose components correspond to the number of mutants in each discrete microhabitat  $x_i = 0, 1, \dots, M - 1$ . The system evolves according to a continuous time master equation

$$\frac{dP_m}{dt} = \sum_{m'} \Omega_{mm'} P_{m'}, \quad (1)$$

where  $m$  and  $m'$  denote different states of the system and  $\Omega$  is a  $N^M \times N^M$  matrix whose entries depend on the wild-type fitness value  $r_0(x_i)$  at each spatial location  $x_i$  (see SI). For tractability, we restrict our analysis to  $M = 3$ , which is the simplest model that allows for potentially non-monotonic fitness landscapes, such as fitness peaks and fitness valleys. In what follows, we refer to the vector  $s(x_i) \equiv 1 - r_0(x_i)$  as the spatial profile of selection pressure, as it measures the difference in fitness between resistant and wild-type cells in each microhabitat ( $x_i$ ). Intuitively, large values of  $s(x_i)$  correspond to regions where the resistant mutant has a significant evolutionary advantage over the wild-type cells (e.g. regions of high drug concentration).

While Equation 1 is difficult to solve explicitly, it is straightforward to calculate quantities that describe the evolution of resistance in various spatial profiles. First, we note that the model consists of a single absorbing state—the fully resistant state ( $n^*(x_i) = N$  for all  $x_i$ )—and the system will asymptotically approach this state.

To characterize the speed of fixation, we would like to calculate moments of the first passage time distribution for our system to reach this absorbing state in the presence of different spatial profiles  $s(x_i)$ . The mean first passage for a system governed by Equation 1 obeys the following equation [43, 44]

$$-1 = \sum_{m' \neq m_f} T(m_f|m') \Omega_{m',m_i} \quad (2)$$

where  $T(m_f|m_i)$  is the mean time required for a system initially in state  $m_i$  to first reach state  $m_f$ . When  $m_f$  is chosen to be the fully resistant state ( $n^*(x_i) = N$  for all  $x_i$ ), the coupled set of linear equations in Equation 2 can be solved for the mean time to fixation from all initial states, which provides a wealth of information on the dynamics of resistance evolution (we note that similar equations also exist for higher moments of the first passage time distribution). In particular, we are interested in the mean fixation time  $\tau_f$ , defined as the mean first passage time from a fully wild-type population ( $n^*(x_i) = 0$  for all  $x_i$ ) to a fully resistant population.

In the case of a single microhabitat, it is intuitively clear that the mean fixation time  $\tau_f$  will increase as selection pressure decreases. In the spatially extended case,  $\tau_f$  would also be expected to increase when the selection pressure is globally decreased by a constant amount, though it should also depend on the spatial structure of the specific selection profile  $s(x_i)$ . To investigate the impact of spatial structure alone, we compared  $\tau_f$  across different selection profiles  $s(x_i)$ , all of which were characterized by the same spatially averaged selection pressure,  $\langle s \rangle = \sum_i s(x_i)/M$ . For simplicity, we begin with a symmetric profile characterized by a background selection pressure  $s_0$  in the edge habitats and a relative peak of height  $\delta s$  in the center habitat (Fig. 1a). This toy landscape has an average selection pressure of  $\langle s \rangle = s_0 + \delta s/M$ , and the parameters  $s_0$  and  $\delta s$  are constrained by the fact that  $0 \leq s(x_i) \leq 1$  at all spatial locations. We vary  $\delta s$  systematically to explore different selection profiles, which can include a single selection pressure valley ( $\delta s < 0$ ), a homogeneous landscape ( $\delta s = 0$ ), or a single selection pressure peak ( $\delta s > 0$ ).

The mean fixation time  $\tau_f$  for  $\mu = 5 \times 10^{-3}$  and  $\beta = 0.08$  is shown in Fig. 1b. Interestingly, the mean fixation time can take values that are higher or lower than the spatially homogeneous landscape with  $\delta s = 0$ , even though  $\langle s \rangle$  is constant across all selection landscapes. To understand the trade-offs that lead to accelerated or decelerated resistance, we repeated the calculation for a broad range of  $\mu$  and  $\beta$  values. The parameter space can be divided into three non-overlapping regions where the homogeneous landscape 1) leads to the smallest value of  $\tau_f$ , 2) leads to the largest value of  $\tau_f$ , or 3) does not correspond to an extremum  $\tau_f$  (Fig. 2a). While we restrict ourselves primarily to  $N = 25$ ,  $\langle s \rangle = 0.167$ , and to symmetric landscapes, we find qualitatively similar results

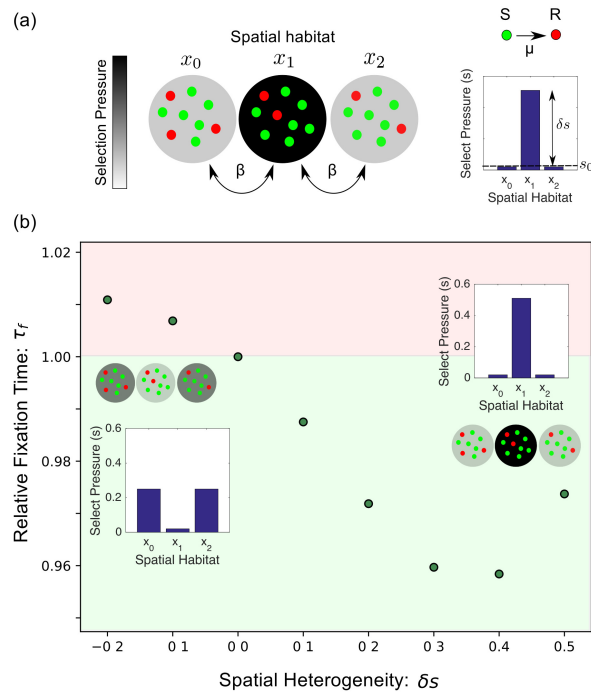

FIG. 1. (a) Stochastic model for emergence and spread of resistant cells (red) in a spatially extended population of sensitive cells (green). Each spatial habitat ( $x_i$ ) contains  $N$  total cells. Cells migrate at a rate  $\beta$  between neighboring habitats, and sensitive cells mutate at a rate  $\mu$  to resistant cells. The spatial distribution of selection pressure is characterized by a background value ( $s_0$ ) and a peak height ( $\delta s$ ). (b) Example plot of the mean fixation time for different landscapes with  $\mu = 5 \times 10^{-3}$ ,  $\beta = 0.08$ ,  $N = 25$ , and  $\langle s \rangle = 0.167$ . The time to fixation can be either faster (green) or slower (red) than the spatially homogeneous landscape with  $\delta s = 0$ . Inset: selection landscapes for  $\delta s = -0.2$  and  $\delta s = 0.5$ .

(i.e. 3 distinct regions) for other values of  $\langle s \rangle$  (Fig. S1),  $N$  (Fig. S2), as well as for permuted selection profiles (Fig. S3), globally coupled profiles (Fig. S3), and monotonic (gradient) selection profiles (Fig. S4).

These results can be intuitively understood as follows. The dynamics leading to fixation are dominated by three main timescales:  $\tau_1$ : the time to have a stable, small population of mutants;  $\tau_2$ : the time required for this population to grow to dominate the system; and  $\tau_3$ : the time required for this large mutant population to become fixed in the population. The fixation time is thus the sum of these three different timescales, which are set by the selection pressure landscape as well as the parameters  $\mu$  and  $\beta$ . In the limit  $\beta \ll \mu$ , the three microhabitats are essentially independent. Thus, the fixation time of the system is simply the slowest of the three independent fixation times. In Fig. 2b, we see that any spatial heterogeneity slows down the emergence of fixation in this limit. Spatial heterogeneity necessarily results in a microhabitat with a smaller wild-type selection pressure than would be possible in the spatially homogeneous landscape. This

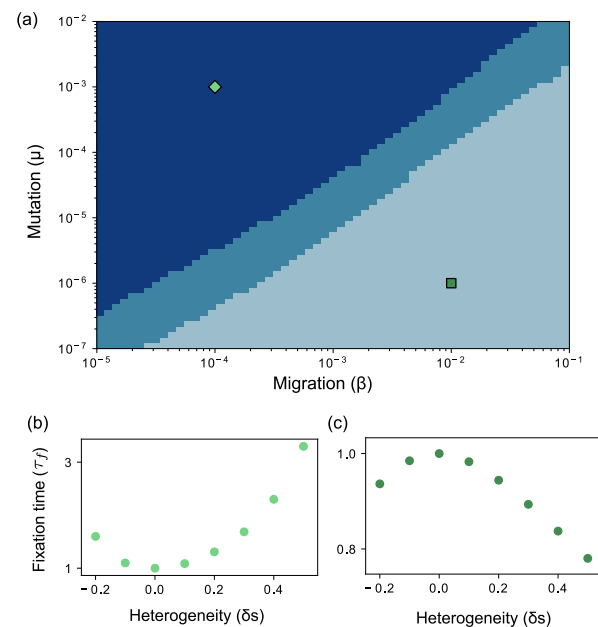

FIG. 2. Spatial heterogeneity can speed up or slow fixation depending on the rates of migration and mutation. (a) Phase diagram illustrates region of parameter space where the homogeneous landscape leads to a maximum (light blue), minimum (dark blue) or intermediate (medium blue) value of the fixation time. Lower panels show sample fixation curves in the regions where any heterogeneity slows fixation (b,  $\beta = 10^{-4}$ ,  $\mu = 10^{-3}$ ) or accelerates fixation (c,  $\beta = 10^{-2}$ ,  $\mu = 10^{-6}$ ).  $N = 25$  and  $\langle s \rangle = 0.167$  in all panels.

microhabitat consequently requires more time to reach fixation, which is dominated by  $\tau_3$  in this regime.

In the limit  $\mu \ll \beta$ , any spatial heterogeneity leads to faster fixation (Fig. 2c). In this limit of small mutation rate, fixation is limited by the time it takes to acquire resistant mutants— $\tau_f$  is dominated by  $\tau_1$ . In this sense, the initial seed mutants are evolutionarily “expensive”. In microhabitats with a large selection pressure  $s(x_i)$ , wild-type cells are less likely to replicate at the expense of an existing mutant—that is, the mutant is less likely to be lost by genetic drift—making these microhabitats ideal for initial seed mutants. For this reason, spatial heterogeneity speeds up evolution in this region (see also SI, including Fig. S6 and Fig. S7).

In general, spatial heterogeneity produces two conflicting influences on the fixation time. As spatial heterogeneity increases, the selection pressure of the highest wild-type selection microhabitat further increases, which allows mutants to safely emerge and decreases  $\tau_1$ . But the selection pressure of the minimum wild-type selection microhabitat necessarily decreases, which increases  $\tau_3$ . In the two limiting cases of the parameters, one of these timescales dominates the fixation time, resulting in intuitive results. But outside of these limits, the fixation time is not dominated by a single timescale, resulting

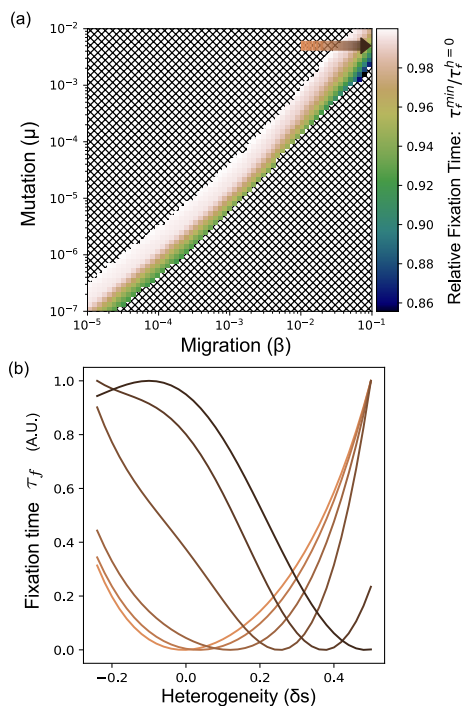

FIG. 3. (a) Minimum fixation times ( $\tau_f^{\min}$ ) over different selection pressure distributions (relative to fixation times in homogeneous case,  $\tau_f^{\delta s=0}$ ) in the intermediate parameter region where fixation can be both accelerated and decelerated.  $N = 25$  and  $\langle s \rangle = 0.167$ . (b) Across a specific trajectory in the intermediate region (arrow in panel (a)), the dependence of  $\tau_f$  on heterogeneity ( $\delta s$ ) transitions smoothly from a state with a minimum at  $\delta s = 0$  (lightest curve) to one with a maximum at  $\delta s = 0$  (darkest curve). For ease of comparison, fixation times are scaled to arbitrary units between 0 and 1.

in non-trivial selection landscapes leading to the fastest fixation. To further investigate evolution in the intermediate regime, we calculated the minimum fixation times ( $\tau_f^{\min}$ ) over different selection pressure distributions and normalized them relative to fixation times in homogeneous case  $\tau_f^{\delta s=0}$  (Fig. 3a). For many of the parameter values resulting in intermediate behavior, we see little deviation from the behavior observed in the limit  $\beta \ll \mu$ , where  $\delta s = 0$  leads to the fastest fixation. However, we observe that there are parameter values that show significant deviation as we increase  $\beta$ ; for example, in the high migration limit of the intermediate regime, fixation times can be decreased by more than 14 percent. To understand how the spatial  $\tau_f$  profiles change over this intermediate region, we fix  $\mu$  and traverse across a trajectory in  $\beta$  as shown by the arrow in Fig. 3a. The resulting spatial  $\tau_f$  profiles for each pair of parameters is displayed in Fig. 3b. We observe that as we increase  $\beta$ ,  $\tau_f$  smoothly transitions from being minimized at  $\delta s = 0$  to being maximized near  $\delta s = 0$ .

While fixation time from the purely wild-type to the purely resistant state can be perturbed by varying the

spatial selection pressure profile, it is not clear how these results would change given a subpopulation of resistant cells. In practical terms, consider a situation where resistance has arisen at some spatial location, but it has not yet had time to spread uniformly over the population. Is it possible to choose the spatial distribution of selection pressure—for example, by spatially dosing the drug—to minimize the time to fixation from this state? To investigate this question, we consider a population consisting of  $N/2$  mutants in the center microhabitat and calculate the mean fixation from this initial state for different spatial profiles of selection pressure. Specifically, we calculate the optimal value for  $\delta s$ —that is, the heterogeneity corresponding to the spatial landscape with the slowest fixation time—in different regions of parameter space (Fig. 4a). We observe two distinct regions of parameter space that lead to two very different dosing regimes. In the region  $\mu \gg \beta$ , slowest resistance occurs when we maximizing the amount of drug in the center microhabitat ( $\delta s = 0.5$ ). Interestingly, however, in the regime  $\beta \gg \mu$  fixation is optimally slowed by maximizing the amount of drug in the two microhabitats without any initial mutants ( $\delta s = -0.2$ ). This counter-intuitive result suggests that the optimal strategy for slowing fixation would be to maximally dose the drug in regions of space that currently lack resistant mutants.

We can understand this behavior by fixing a value of  $\beta$  and changing  $\mu$  across the two different regimes. When  $\mu$  is relatively large compared to  $\beta$ , fixation requires mutations to emerge independently in each of the three microhabitats. As a result, the optimal strategy is to minimize selection pressure in the microhabitats without mutants, thereby increasing the fixation times in those spatial regions. As we decrease  $\mu$ , mutations become increasingly “expensive” and the impact of migration is increased. In this case, fixation is achieved most slowly by minimizing the selection pressure in the microhabitat with initial mutants, since losing this small initial population requires waiting for another random mutation, which happens with a small probability in this parameter regime. To further understand these two regimes, we can compare the fixation times with the largest values of  $\delta s$  to that obtained with the smallest value of  $\delta s$  consistent with physical selection values. In Fig. 4b, we see that the selection landscape that leads to the slowest fixation rapidly becomes sub-optimal as mutation rate is decreased at constant  $\beta$ .

Our results demonstrate that spatial heterogeneity in selection pressure can modulate the mean fixation time of resistant mutants, with homogeneous profiles leading to maximum, minimum, or intermediate fixation times depending on the rates of mutation and migration. While we have focused on symmetric spatial profiles, similar qualitative results appear to hold for a wide range of spatial profiles and connection topologies. Importantly, our results predict that spatial heterogeneity in drug



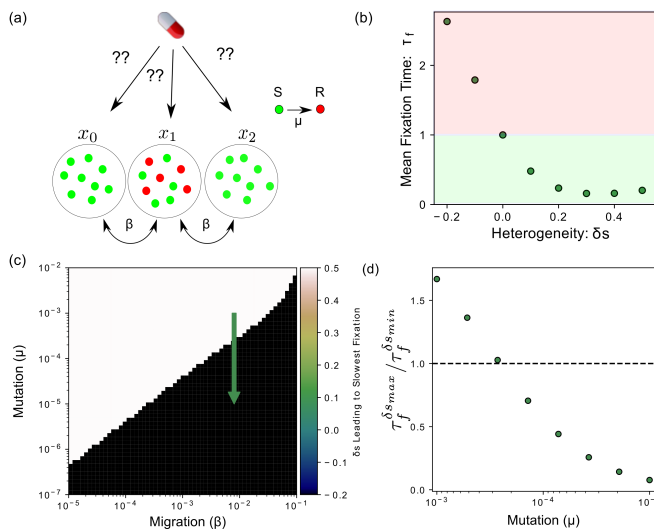

FIG. 4. (a) Schematic: when a subpopulation of mutants (red) is not uniformly distributed in space, the spatial distribution of selection pressure (i.e. drug concentration) can be chosen to impact the mean fixation time. (c) The optimal spatial heterogeneity ( $\delta s$ ) leading to the slowest mean fixation time from an initial state of  $(0, N/2, 0)$  with  $N = 25$  and  $\langle s \rangle = 0.167$ . Depending on the specific parameter regime, the optimal selection pressure profile is the one with the largest possible valley consistent with  $\langle s \rangle$  (black) or the one having the largest possible peak (white). (d) Relative magnitude of  $\tau_f^{\delta s_{max}}$  (mean fixation time at maximum value of  $\delta s$ ) and  $\tau_f^{\delta s_{min}}$  (mean fixation time at minimum value of  $\delta s$ ) as mutation rate decreases at constant migration rate (green arrow, panel (c)).

concentrations would impact populations of motile and non-motile cells in opposing ways, even when mutations rates are relatively similar. While heterogeneity is likely to accelerate evolution for populations of motile bacteria, similar to what is observed in experiments with *E. coli* [22, 24], our results predict slowed evolution for less motile cells (e.g. the nosocomial pathogen *E. faecalis* [45]) or cells with rapid mutation rates. Perhaps most interestingly, our results suggest counter-intuitive, spatially optimal profiles for slowing the spread of resistance sub-populations. In the long term, these results may lay the groundwork for optimized, spatially-resolved drug dosing strategies for mitigating the effects of drug resistance.

\* kbwood@umich.edu

- [1] S. B. Levy and B. Marshall, "Antibacterial resistance worldwide: causes, challenges and responses," *Nature medicine*, vol. 10, no. 12s, p. S122, 2004.
- [2] C. Holohan, S. Van Schaeysbroeck, D. B. Longley, and P. G. Johnston, "Cancer drug resistance: an evolving paradigm," *Nature reviews. Cancer*, vol. 13, no. 10,

- p. 714, 2013.
- [3] M. M. Gottesman, "Mechanisms of cancer drug resistance," *Annual review of medicine*, vol. 53, no. 1, pp. 615–627, 2002.
- [4] J. Davies and D. Davies, "Origins and evolution of antibiotic resistance," *Microbiology and Molecular Biology Reviews*, vol. 74, no. 3, pp. 417–433, 2010.
- [5] M. Baym, L. K. Stone, and R. Kishony, "Multidrug evolutionary strategies to reverse antibiotic resistance," *Science*, vol. 351, no. 6268, p. aad3292, 2016.
- [6] I. Bozic, J. G. Reiter, B. Allen, T. Antal, K. Chatterjee, P. Shah, Y. S. Moon, A. Yaqubie, N. Kelly, D. T. Le, et al., "Evolutionary dynamics of cancer in response to targeted combination therapy," *Elife*, vol. 2, p. e00747, 2013.
- [7] Y. Iwasa, M. A. Nowak, and F. Michor, "Evolution of resistance during clonal expansion," *Genetics*, vol. 172, no. 4, pp. 2557–2566, 2006.
- [8] E. Toprak, A. Veres, J.-B. Michel, R. Chait, D. L. Hartl, and R. Kishony, "Evolutionary paths to antibiotic resistance under dynamically sustained drug selection," *Nature genetics*, vol. 44, no. 1, pp. 101–105, 2012.
- [9] E. A. Yurtsev, H. X. Chao, M. S. Datta, T. Artemova, and J. Gore, "Bacterial cheating drives the population dynamics of cooperative antibiotic resistance plasmids," *Molecular systems biology*, vol. 9, no. 1, p. 683, 2013.
- [10] R. Chait, A. Craney, and R. Kishony, "Antibiotic interactions that select against resistance," *Nature*, vol. 446, no. 7136, p. 668, 2007.
- [11] J. P. Torella, R. Chait, and R. Kishony, "Optimal drug synergy in antimicrobial treatments," *PLoS computational biology*, vol. 6, no. 6, p. e1000796, 2010.
- [12] E. Hansen, R. J. Woods, and A. F. Read, "How to use a chemotherapeutic agent when resistance to it threatens the patient," *PLoS biology*, vol. 15, no. 2, p. e2001110, 2017.
- [13] A. Fischer, I. Vázquez-García, and V. Mustonen, "The value of monitoring to control evolving populations," *Proceedings of the National Academy of Sciences*, vol. 112, no. 4, pp. 1007–1012, 2015.
- [14] H. Chung, T. D. Lieberman, S. O. Vargas, K. B. Flett, A. J. McAdam, G. P. Priebe, and R. Kishony, "Global and local selection acting on the pathogen *Stenotrophomonas maltophilia* in the human lung," *Nature communications*, vol. 8, p. 14078, 2017.
- [15] D. Nichol, P. Jeavons, A. G. Fletcher, R. A. Bonomo, P. K. Maini, J. L. Paul, R. A. Gatenby, A. R. Anderson, and J. G. Scott, "Steering evolution with sequential therapy to prevent the emergence of bacterial antibiotic resistance," *PLoS computational biology*, vol. 11, no. 9, p. e1004493, 2015.
- [16] M. Gralka, D. Fusco, S. Martis, and O. Hallatschek, "Convection shapes the trade-off between antibiotic efficacy and the selection for resistance in spatial gradients," *Physical Biology*, vol. 14, no. 4, p. 045011, 2017.
- [17] F. Fu, M. A. Nowak, and S. Bonhoeffer, "Spatial heterogeneity in drug concentrations can facilitate the emergence of resistance to cancer therapy," *PLoS Comput Biol*, vol. 11, no. 3, p. e1004142, 2015.
- [18] P. Greulich, B. Waclaw, and R. J. Allen, "Mutational pathway determines whether drug gradients accelerate evolution of drug-resistant cells," *Physical Review Letters*, vol. 109, no. 8, p. 088101, 2012.
- [19] R. Hermsen, J. B. Deris, and T. Hwa, "On the rapidity

- of antibiotic resistance evolution facilitated by a concentration gradient,” *Proceedings of the National Academy of Sciences*, vol. 109, no. 27, pp. 10775–10780, 2012.
- [20] T. B. Kepler and A. S. Perelson, “Drug concentration heterogeneity facilitates the evolution of drug resistance,” *Proceedings of the National Academy of Sciences*, vol. 95, no. 20, pp. 11514–11519, 1998.
- [21] S. Moreno-Gamez, A. L. Hill, D. I. Rosenbloom, D. A. Petrov, M. A. Nowak, and P. S. Pennings, “Imperfect drug penetration leads to spatial monotherapy and rapid evolution of multidrug resistance,” *Proceedings of the National Academy of Sciences*, vol. 112, no. 22, pp. E2874–E2883, 2015.
- [22] Q. Zhang, G. Lambert, D. Liao, H. Kim, K. Robin, C.-k. Tung, N. Pourmand, and R. H. Austin, “Acceleration of emergence of bacterial antibiotic resistance in connected microenvironments,” *Science*, vol. 333, no. 6050, pp. 1764–1767, 2011.
- [23] R. Hermesen and T. Hwa, “Sources and sinks: a stochastic model of evolution in heterogeneous environments,” *Physical review letters*, vol. 105, no. 24, p. 248104, 2010.
- [24] M. Baym, T. D. Lieberman, E. D. Kelsic, R. Chait, R. Gross, I. Yelin, and R. Kishony, “Spatiotemporal microbial evolution on antibiotic landscapes,” *Science*, vol. 353, no. 6304, pp. 1147–1151, 2016.
- [25] C. S. Gokhale, Y. Iwasa, M. A. Nowak, and A. Traulsen, “The pace of evolution across fitness valleys,” *Journal of Theoretical Biology*, vol. 259, no. 3, pp. 613–620, 2009.
- [26] Y. Iwasa, F. Michor, and M. A. Nowak, “Stochastic tunnels in evolutionary dynamics,” *Genetics*, vol. 166, no. 3, pp. 1571–1579, 2004.
- [27] D. M. Weinreich, L. Chao, and P. Phillips, “Rapid evolutionary escape by large populations from local fitness peaks is likely in nature,” *Evolution*, vol. 59, no. 6, pp. 1175–1182, 2005.
- [28] D. B. Weissman, M. M. Desai, D. S. Fisher, and M. W. Feldman, “The rate at which asexual populations cross fitness valleys,” *Theoretical population biology*, vol. 75, no. 4, pp. 286–300, 2009.
- [29] S. T. Pickett and M. L. Cadenasso, “Landscape ecology: spatial heterogeneity in ecological systems,” *Science*, vol. 269, no. 5222, p. 331, 1995.
- [30] M. C. Whitlock and R. Gomulkiewicz, “Probability of fixation in a heterogeneous environment,” *Genetics*, vol. 171, no. 3, pp. 1407–1417, 2005.
- [31] L. A. Real and R. Biek, “Spatial dynamics and genetics of infectious diseases on heterogeneous landscapes,” *Journal of the Royal Society Interface*, vol. 4, no. 16, pp. 935–948, 2007.
- [32] S. Farhang-Sardroodi, A. Darooneh, M. Nikbakht, N. Komarova, and M. Kohandel, “The effect of spatial randomness on the average fixation time of mutants,” *PLoS computational biology*, vol. 13, no. 11, p. e1005864, 2017.
- [33] A. Kaznatcheev, J. G. Scott, and D. Basanta, “Edge effects in game-theoretic dynamics of spatially structured tumours,” *Journal of The Royal Society Interface*, vol. 12, no. 108, p. 20150154, 2015.
- [34] B. Allen, G. Lippner, Y.-T. Chen, B. Fotouhi, N. Momeni, S.-T. Yau, and M. A. Nowak, “Evolutionary dynamics on any population structure,” *Nature*, vol. 544, no. 7649, pp. 227–230, 2017.
- [35] K. S. Korolev, M. Avlund, O. Hallatschek, and D. R. Nelson, “Genetic demixing and evolution in linear stepping stone models,” *Reviews of modern physics*, vol. 82, no. 2, p. 1691, 2010.
- [36] M. Khasin, E. Khain, and L. M. Sander, “Fast migration and emergent population dynamics,” *Physical review letters*, vol. 109, no. 24, p. 248102, 2012.
- [37] M. Khasin, B. Meerson, E. Khain, and L. M. Sander, “Minimizing the population extinction risk by migration,” *Physical review letters*, vol. 109, no. 13, p. 138104, 2012.
- [38] J. N. Waddell, L. M. Sander, and C. R. Doering, “Demographic stochasticity versus spatial variation in the competition between fast and slow dispersers,” *Theoretical population biology*, vol. 77, no. 4, pp. 279–286, 2010.
- [39] G. W. Constable and A. J. McKane, “Fast-mode elimination in stochastic metapopulation models,” *Physical Review E*, vol. 89, no. 3, p. 032141, 2014.
- [40] G. W. Constable and A. J. McKane, “Population genetics on islands connected by an arbitrary network: An analytic approach,” *Journal of theoretical biology*, vol. 358, pp. 149–165, 2014.
- [41] G. W. Constable and A. J. McKane, “Stationary solutions for metapopulation moran models with mutation and selection,” *Physical Review E*, vol. 91, no. 3, p. 032711, 2015.
- [42] C. Li, “The statistical processes of evolutionary theory,” *American journal of human genetics*, vol. 14, no. 4, p. 438, 1962.
- [43] C. W. Gardiner, *Handbook of stochastic methods for physics, chemistry and the natural sciences*, vol. 13 of *Springer Series in Synergetics*. Berlin: Springer-Verlag, third ed., 2004.
- [44] N. V. Kampen, *Stochastic processes in physics and chemistry*. North Holland, 2007.
- [45] D. B. Clewell, M. S. Gilmore, Y. Ike, and N. Shankar, *Enterococci: from commensals to leading causes of drug resistant infection*. Massachusetts Eye and Ear Infirmary, 2014.
